# Supplementary material for: Spectroscopic studies of the interaction of 3-(2-thienyl)-[1,2,3]triazolo[1,5-a]pyridine with 2,6-dimethyl-β-cyclodextrin and ctDNA
Source: Royal Society of Chemistry journal article supplement (doi:10.1039/c6ob01573e), 2016-01-01
Supplement: c6ob01573e1.pdf [file c6ob01573e1.pdf]

## Supporting Information

### Spectroscopic studies of the interaction of 3-(2-thienyl)- [1,2,3]triazolo[1,5-a]pyridine with 2,6-dimethyl- $\beta$ -cyclodextrin and ctDNA.

T. Cifuentes<sup>1</sup>, J. Cayupi<sup>1</sup>, C. Celis-Barros<sup>2</sup>, G. Zapata-Torres<sup>2</sup>, Rafael Ballesteros<sup>3</sup>, Rafael Ballesteros-Garrido<sup>3</sup>, B. Abarca<sup>3</sup> and C. Jullian<sup>1\*</sup>

<sup>1</sup>Departamento Química Orgánica y Físicoquímica, Facultad de Ciencias Químicas y Farmacéuticas. Universidad de Chile. Chile.

<sup>2</sup>Departamento Química Analítica e Inorgánica, Facultad de Ciencias Químicas y Farmacéuticas. Universidad de Chile. Chile.

<sup>3</sup>Departamento de Química Orgánica, Facultad de Farmacia, Universidad de Valencia, Spain

\* to whom correspondence should be addressed: [cjullian@ciq.uchile.cl](mailto:cjullian@ciq.uchile.cl)

### Fluorescence titration of TTP with cyclodextrin

$6 \times 10^{-6}$  M concentration of TTP.  $\lambda_{\text{excitation}} = 333$  nm,  $\text{slit}_{\text{ex}} = 15$  and  $\text{slit}_{\text{em}} = 4$ .

Cyclodextrin concentration from 0 – 10 mM

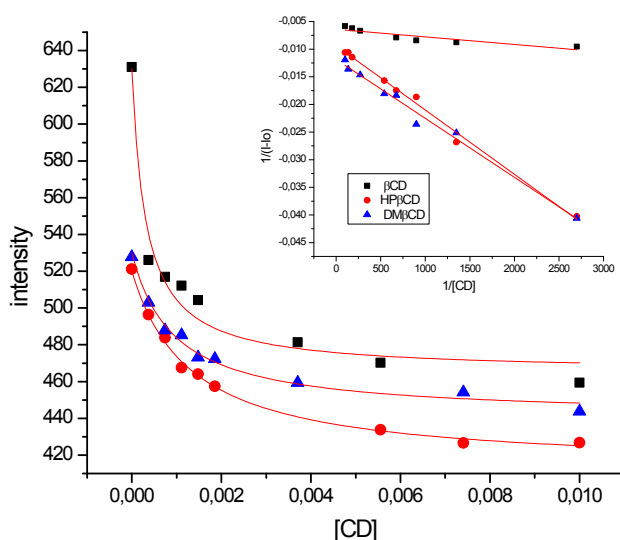

**Synthesis of 3-(2-Thienyl)-[1,2,3]triazolo[1,5-a]pyridine TTP**, (according to Abarca, B.; Ballesteros, R.; Elmasnaouy, M., Tetrahedron, 1998, 54, 15287-15292)

A mixture of 2-pyridyl-2-thienylmethanone (4.65g, 200mmol) and hydrazine (35% solution in water) (12ml, 200mmol) was heated for 1h under reflux. Then a solution of sodium hydroxide (30ml, 10% in water) was added and extracted with ether. The organic layer was dried and evaporated to give the corresponding hydrazone (4.27g, 85%), which was dissolved in chloroform without purification, and heated to reflux for 2h with manganese oxide (3.65g, 400mmol). Then was filtered and the solvent evaporated to give almost pure TTP as a solid, crystallised from hexane (3.5g, 83%). m.p. 114-115°C.

HRMS found for  $M^+$  201.0353;  $C_{10}H_7N_3S$  requires 201.0361. NMR  $^1H$  ( $CDCl_3$ )  $\delta$  8.70(d,  $J=7.0$ Hz, 1H); 7.96(d,  $J=9.1$ Hz, 1H); 7.55(d,  $J=3.6$ Hz, 1H); 7.38(d,  $J=5.1$ Hz, 1H); 7.34(dd,  $J_1=7.0$ Hz,  $J_2=9.1$ Hz, 1H); 7.16(dd,  $J_1=5.1$ Hz,  $J_2=3.6$ Hz, 1H); 7.05(d,  $J=7.0$ Hz, 1H). NMR  $^{13}C$  ( $CDCl_3$ )  $\delta$ , 133.28(C); 132.72(C); 129.68(C); 127.75(CH); 125.90(CH); 125.41(CH); 125.11(CH); 124.03(CH); 118.21(CH); 115.85(CH).  $\nu_{\text{max}}$  3081, 1622, 1520, 1378, 1210, 722  $cm^{-1}$ .

Ground State Energy of TTP = -947.68183484 hartrees

Frequencies of TTP (cm<sup>-1</sup>)

|           |           |           |
|-----------|-----------|-----------|
| 15.5063   | 85.9945   | 107.1948  |
| 196.0441  | 219.0553  | 279.5202  |
| 323.2504  | 350.7038  | 429.6047  |
| 493.5822  | 498.8477  | 573.5828  |
| 579.4551  | 593.9085  | 634.1884  |
| 678.7845  | 694.4123  | 702.3520  |
| 745.7941  | 746.4697  | 766.5413  |
| 792.3488  | 848.5609  | 852.6547  |
| 854.3839  | 915.4015  | 922.1551  |
| 948.3160  | 971.2979  | 982.4559  |
| 1034.8797 | 1069.3679 | 1107.6796 |
| 1139.5161 | 1140.9071 | 1180.3170 |
| 1198.2082 | 1243.1265 | 1275.0830 |
| 1307.4872 | 1352.5708 | 1380.0112 |
| 1400.5760 | 1442.5979 | 1486.7604 |
| 1508.5858 | 1554.8833 | 1580.4995 |
| 1611.0914 | 1683.6027 | 3208.7822 |
| 3221.3939 | 3226.5646 | 3234.8272 |
| 3246.3521 | 3256.4040 | 3270.5470 |

## Cartesian Coordinates

*TTP*

|   |          |          |          |
|---|----------|----------|----------|
| C | -1.06552 | -0.10851 | -0.00002 |
| C | -3.42235 | 0.49132  | 0.00003  |
| C | -3.76079 | -0.83031 | 0.00019  |
| C | -2.74451 | -1.83213 | 0.00039  |
| C | -1.41694 | -1.48068 | 0.00031  |
| C | 0.08957  | 0.69286  | -0.00017 |
| H | -4.11348 | 1.32394  | -0.00004 |
| H | -4.80833 | -1.10755 | 0.00041  |
| H | -3.02878 | -2.87884 | 0.00006  |
| H | -0.63674 | -2.2322  | 0.00073  |
| N | -2.09365 | 0.8252   | -0.00015 |
| N | -1.60858 | 2.09525  | -0.00025 |
| N | -0.3046  | 1.99558  | -0.00029 |
| C | 1.49862  | 0.34579  | -0.00017 |
| C | 2.56247  | 1.21928  | 0.00048  |
| S | 2.07075  | -1.31112 | -0.00063 |
| C | 3.82778  | 0.56697  | 0.00065  |
| H | 2.42052  | 2.29259  | 0.00076  |
| C | 3.72956  | -0.79664 | 0.00018  |
| H | 4.77521  | 1.09361  | 0.00137  |
| H | 4.52002  | -1.5335  | -0.00002 |

*2, 5-dimethoxy- $\beta$ -cyclodextrin complexed with TTP*

|     |           |           |           |
|-----|-----------|-----------|-----------|
| C1  | -0.088000 | -0.048000 | 0.627000  |
| C2  | 1.170000  | 0.398000  | 2.668000  |
| C3  | 0.363000  | 1.468000  | 2.934000  |
| C4  | -0.699000 | 1.803000  | 2.039000  |
| C5  | -0.921000 | 1.058000  | 0.904000  |
| C6  | 0.039000  | -1.036000 | -0.366000 |
| N11 | 0.934000  | -0.334000 | 1.532000  |
| N12 | 1.092000  | -1.854000 | -0.042000 |
| N13 | 1.683000  | -1.478000 | 1.108000  |
| C14 | -0.727000 | -1.270000 | -1.564000 |
| C15 | -2.059000 | -1.041000 | -1.838000 |
| C17 | -2.428000 | -1.418000 | -3.166000 |
| C19 | -1.373000 | -1.925000 | -3.882000 |
| S16 | 0.088000  | -1.956000 | -2.954000 |
| C1  | 4.972500  | -3.871900 | -0.437700 |
| C2  | 4.421000  | -4.427300 | -1.769600 |
| O3  | 4.876200  | -3.624800 | -2.851200 |
| C4  | 2.892900  | -4.524200 | -1.760800 |
| O5  | 2.498600  | -5.185100 | -2.943200 |
| C6  | 2.410800  | -5.287300 | -0.508600 |
| O7  | 0.984800  | -5.099800 | -0.406200 |
| C8  | 3.105800  | -4.770500 | 0.770800  |
| O9  | 4.536600  | -4.752000 | 0.590600  |
| C10 | 2.837800  | -5.656400 | 1.984600  |
| O11 | 3.222300  | -5.055700 | 3.213100  |
| C12 | 0.095000  | -6.199100 | -0.462900 |

|     |           |           |           |
|-----|-----------|-----------|-----------|
| C13 | -0.900800 | -6.020200 | -1.620900 |
| 014 | -0.162400 | -5.916000 | -2.831400 |
| C15 | -1.813100 | -4.809200 | -1.389800 |
| 016 | -2.809200 | -4.782500 | -2.400300 |
| C17 | -2.445500 | -4.884100 | 0.023400  |
| 018 | -3.130800 | -3.642900 | 0.298800  |
| C19 | -1.374600 | -5.146400 | 1.091300  |
| 020 | -0.650300 | -6.337000 | 0.735800  |
| C21 | -1.925200 | -5.341100 | 2.494200  |
| 022 | -2.957200 | -6.312700 | 2.486400  |
| C23 | -4.389600 | -3.723300 | 0.971700  |
| C24 | -5.531100 | -3.660200 | -0.054500 |
| 025 | -5.325000 | -4.727400 | -0.978600 |
| C26 | -5.572000 | -2.298900 | -0.752500 |
| 027 | -6.747800 | -2.163500 | -1.557100 |
| C28 | -5.448400 | -1.120800 | 0.233500  |
| 029 | -5.095600 | 0.037400  | -0.530500 |
| C30 | -4.411600 | -1.356300 | 1.352800  |
| 031 | -4.546300 | -2.674000 | 1.904500  |
| C32 | -4.584600 | -0.412600 | 2.534100  |
| 033 | -5.927300 | -0.476800 | 2.981600  |
| C34 | -5.899000 | 1.179800  | -0.367600 |
| C35 | -5.955000 | 1.992400  | -1.676800 |
| 036 | -6.236700 | 1.240800  | -2.842900 |
| C37 | -4.647800 | 2.730600  | -1.963700 |
| 038 | -4.827900 | 3.595900  | -3.072800 |
| C39 | -4.244100 | 3.563200  | -0.751600 |
| 040 | -2.945300 | 4.097600  | -0.987200 |
| C41 | -4.227700 | 2.712300  | 0.527400  |

|     |           |           |           |
|-----|-----------|-----------|-----------|
| 042 | -5.466100 | 2.014200  | 0.686200  |
| C43 | -4.064200 | 3.531500  | 1.800100  |
| 044 | -5.009100 | 4.588300  | 1.792100  |
| C45 | -2.749900 | 5.457500  | -0.707800 |
| C46 | -1.785600 | 6.032900  | -1.746200 |
| 047 | -2.163700 | 5.807500  | -3.091300 |
| C48 | -0.398400 | 5.399300  | -1.602100 |
| 049 | 0.457000  | 5.950100  | -2.578800 |
| C50 | 0.158200  | 5.656200  | -0.197300 |
| 051 | 1.367000  | 4.909400  | 0.016600  |
| C52 | -0.891900 | 5.185700  | 0.843600  |
| 053 | -2.221900 | 5.691000  | 0.584700  |
| C54 | -0.508000 | 5.634300  | 2.243300  |
| 055 | -1.291500 | 4.942500  | 3.201800  |
| C56 | 2.567000  | 5.568100  | 0.409200  |
| C57 | 3.627400  | 5.518300  | -0.698400 |
| 058 | 3.142900  | 6.258300  | -1.789300 |
| C59 | 3.964700  | 4.055200  | -1.011300 |
| 060 | 4.977700  | 4.036100  | -1.996200 |
| C61 | 4.466100  | 3.381400  | 0.288800  |
| 062 | 4.660800  | 1.966000  | 0.073100  |
| C63 | 3.480000  | 3.583400  | 1.452500  |
| 064 | 3.120400  | 4.976900  | 1.578900  |
| C65 | 4.056700  | 3.138400  | 2.795900  |
| 066 | 5.321600  | 3.697700  | 3.104500  |
| C67 | 5.961800  | 1.411100  | 0.205400  |
| C68 | 6.348900  | 0.671200  | -1.083800 |
| 069 | 6.222000  | 1.571000  | -2.178700 |
| C70 | 5.518300  | -0.601000 | -1.299900 |

|     |           |           |           |
|-----|-----------|-----------|-----------|
| 071 | 6.094400  | -1.262800 | -2.407500 |
| 072 | 5.532600  | -1.483600 | -0.049300 |
| 073 | 4.552300  | -2.538100 | -0.218700 |
| 074 | 5.197700  | -0.645700 | 1.201900  |
| 075 | 6.079000  | 0.503200  | 1.290100  |
| 076 | 5.322100  | -1.450900 | 2.485500  |
| 077 | 6.550100  | -2.150500 | 2.506200  |
| H78 | 6.065300  | -3.930600 | -0.430200 |
| H79 | 4.832000  | -5.441600 | -1.874200 |
| H80 | 2.484800  | -3.503700 | -1.709600 |
| H81 | 1.526900  | -5.287700 | -2.924800 |
| H82 | 2.635600  | -6.354300 | -0.648500 |
| H83 | 2.749500  | -3.751000 | 0.962300  |
| H84 | 3.439300  | -6.566300 | 1.885000  |
| H85 | 1.775700  | -5.939000 | 2.005100  |
| H86 | 0.650300  | -7.135800 | -0.580900 |
| H87 | -1.526200 | -6.923800 | -1.651800 |
| H88 | -1.198000 | -3.899700 | -1.447000 |
| H89 | -3.672500 | -4.612000 | -1.983600 |
| H90 | -3.159500 | -5.713000 | 0.035200  |
| H91 | -0.685800 | -4.293000 | 1.124600  |
| H92 | -2.302800 | -4.376300 | 2.867200  |
| H93 | -1.100100 | -5.662000 | 3.148600  |
| H94 | -4.446400 | -4.652200 | 1.545200  |
| H95 | -6.472000 | -3.825300 | 0.495300  |
| H96 | -4.734400 | -2.246600 | -1.452900 |
| H97 | -7.510800 | -2.224700 | -0.964000 |
| H98 | -6.420200 | -0.967600 | 0.721300  |
| H99 | -3.405400 | -1.229300 | 0.935100  |



|      |           |           |           |
|------|-----------|-----------|-----------|
| H100 | -4.326600 | 0.604800  | 2.227200  |
| H101 | -3.893900 | -0.726200 | 3.332600  |
| H102 | -6.909700 | 0.878400  | -0.067900 |
| H103 | -6.738500 | 2.753600  | -1.524800 |
| H104 | -3.859200 | 1.990900  | -2.167700 |
| H105 | -5.205700 | 3.039800  | -3.770100 |
| H106 | -4.970500 | 4.373100  | -0.622700 |
| H107 | -3.396000 | 1.995500  | 0.457400  |
| H108 | -4.237900 | 2.868600  | 2.663200  |
| H109 | -3.048300 | 3.921300  | 1.877400  |
| H110 | -3.708700 | 5.986300  | -0.703700 |
| H111 | -1.703800 | 7.116300  | -1.555800 |
| H112 | -0.502000 | 4.311300  | -1.733200 |
| H113 | -0.055000 | 5.911300  | -3.401000 |
| H114 | 0.358600  | 6.730900  | -0.088300 |
| H115 | -0.906700 | 4.088500  | 0.813800  |
| H116 | -0.663000 | 6.722500  | 2.330000  |
| H117 | 0.558700  | 5.419500  | 2.400800  |
| H118 | 2.353500  | 6.609000  | 0.675400  |
| H119 | 4.533900  | 5.996700  | -0.289600 |
| H120 | 3.053100  | 3.548200  | -1.358000 |
| H121 | 5.273300  | 3.111500  | -2.106200 |
| H122 | 5.423900  | 3.840700  | 0.560100  |
| H123 | 2.574900  | 2.992000  | 1.255000  |
| H124 | 3.325600  | 3.359500  | 3.588500  |
| H125 | 4.210100  | 2.056500  | 2.751100  |
| H126 | 6.684200  | 2.204700  | 0.419200  |
| H127 | 7.401000  | 0.371700  | -0.976600 |
| H128 | 4.478000  | -0.302500 | -1.501100 |

|      |            |            |            |
|------|------------|------------|------------|
| H129 | 5. 559900  | -2. 058000 | -2. 601800 |
| H130 | 6. 526700  | -1. 922600 | 0. 079500  |
| H131 | 4. 161300  | -0. 290200 | 1. 125200  |
| H132 | 5. 239400  | -0. 772300 | 3. 349600  |
| H133 | 4. 480700  | -2. 158900 | 2. 523300  |
| C134 | -6. 243400 | 0. 529800  | 3. 924000  |
| H135 | -6. 151200 | 1. 532700  | 3. 485400  |
| H136 | -7. 279900 | 0. 368600  | 4. 230700  |
| H137 | -5. 600800 | 0. 469800  | 4. 816200  |
| C138 | -3. 409700 | -6. 636500 | 3. 787500  |
| H139 | -3. 819100 | -5. 757800 | 4. 309000  |
| H140 | -4. 198000 | -7. 384600 | 3. 678800  |
| H141 | -2. 600400 | -7. 058700 | 4. 401900  |
| C142 | 2. 235700  | -4. 210000 | 3. 769500  |
| H143 | 1. 304600  | -4. 759900 | 3. 979600  |
| H144 | 2. 637000  | -3. 825900 | 4. 710300  |
| H145 | 1. 991400  | -3. 355700 | 3. 120700  |
| C146 | 6. 588500  | -3. 143000 | 3. 516300  |
| H147 | 5. 781300  | -3. 878000 | 3. 386000  |
| H148 | 7. 554200  | -3. 647500 | 3. 433500  |
| H149 | 6. 508800  | -2. 702000 | 4. 522600  |
| C150 | 5. 285400  | 4. 965900  | 3. 739900  |
| H151 | 4. 907100  | 5. 753300  | 3. 079800  |
| H152 | 4. 658700  | 4. 940300  | 4. 645100  |
| H153 | 6. 312800  | 5. 197000  | 4. 033900  |
| C154 | -0. 925200 | 5. 257200  | 4. 529500  |
| H155 | -1. 570800 | 4. 675400  | 5. 191600  |
| H156 | 0. 124700  | 4. 996400  | 4. 734300  |
| H157 | -1. 062400 | 6. 327200  | 4. 750400  |

|      |            |            |            |
|------|------------|------------|------------|
| C158 | -4. 846800 | 5. 463500  | 2. 892100  |
| H159 | -5. 040800 | 4. 951100  | 3. 848600  |
| H160 | -3. 835100 | 5. 885800  | 2. 920500  |
| H161 | -5. 578300 | 6. 267200  | 2. 773900  |
| C162 | 4. 124700  | 6. 830000  | -2. 637900 |
| H163 | 4. 839700  | 7. 445200  | -2. 067400 |
| H164 | 4. 681500  | 6. 067500  | -3. 189100 |
| H165 | 3. 584700  | 7. 475700  | -3. 335300 |
| C166 | -3. 321400 | 6. 504600  | -3. 524700 |
| H167 | -4. 236500 | 6. 055100  | -3. 124800 |
| H168 | -3. 273600 | 7. 569800  | -3. 252000 |
| H169 | -3. 347300 | 6. 420900  | -4. 613800 |
| C170 | -7. 576700 | 0. 791400  | -2. 964900 |
| H171 | -7. 793200 | -0. 023000 | -2. 265700 |
| H172 | -8. 291800 | 1. 614100  | -2. 813000 |
| H173 | -7. 688000 | 0. 406800  | -3. 981300 |
| C174 | -6. 488600 | -5. 237900 | -1. 627200 |
| H175 | -7. 227800 | -5. 575300 | -0. 887100 |
| H176 | -6. 942800 | -4. 489400 | -2. 281600 |
| H177 | -6. 160300 | -6. 097300 | -2. 215600 |
| C178 | -0. 816000 | -6. 385600 | -4. 011700 |
| H179 | -1. 128200 | -7. 432200 | -3. 890700 |
| H180 | -1. 687600 | -5. 773300 | -4. 251400 |
| H181 | -0. 077200 | -6. 326000 | -4. 813800 |
| C182 | 5. 173900  | -4. 315900 | -4. 064300 |
| H183 | 5. 938600  | -5. 087200 | -3. 897100 |
| H184 | 4. 274500  | -4. 774800 | -4. 480000 |
| H185 | 5. 570200  | -3. 567300 | -4. 753800 |
| C186 | 7. 188700  | 1. 433300  | -3. 218000 |

|      |          |          |           |
|------|----------|----------|-----------|
| H187 | 8.208600 | 1.545800 | -2.823500 |
| H188 | 7.094500 | 0.464100 | -3.712200 |
| H189 | 6.993600 | 2.241200 | -3.927200 |

### **1bna complexed with TTP**

|     |         |         |         |
|-----|---------|---------|---------|
| O1  | 18.9350 | 34.1950 | 25.6170 |
| H2  | 18.4120 | 34.9840 | 25.6920 |
| C3  | 19.1300 | 33.9210 | 24.2190 |
| H4  | 18.1710 | 33.8570 | 23.6540 |
| H5  | 19.5710 | 34.7840 | 23.6680 |
| C6  | 19.9610 | 32.6680 | 24.1000 |
| H7  | 20.9630 | 32.8780 | 24.5410 |
| O8  | 19.3600 | 31.5830 | 24.8520 |
| C9  | 20.1720 | 32.1220 | 22.6940 |
| H10 | 20.1670 | 32.9140 | 21.9090 |
| O11 | 21.3500 | 31.3250 | 22.6810 |
| C12 | 18.9480 | 31.2230 | 22.6470 |
| H13 | 17.9540 | 31.7180 | 22.5470 |
| H14 | 18.8000 | 30.6080 | 21.7290 |
| C15 | 19.2310 | 30.4820 | 23.9440 |
| H16 | 20.1680 | 29.8800 | 23.8840 |
| N17 | 18.0700 | 29.6610 | 24.3800 |
| C18 | 18.2240 | 28.4540 | 25.0150 |
| O19 | 19.3600 | 28.0140 | 25.2140 |
| N20 | 17.1430 | 27.7610 | 25.3770 |
| H21 | 17.2540 | 26.8670 | 25.8550 |
| C22 | 15.9170 | 28.2260 | 25.1200 |
| N23 | 14.8280 | 27.4770 | 25.4440 |

|     |          |          |          |
|-----|----------|----------|----------|
| H24 | 14. 9730 | 26. 5860 | 25. 9190 |
| H25 | 13. 8920 | 27. 8320 | 25. 2480 |
| C26 | 15. 7190 | 29. 4420 | 24. 4710 |
| H27 | 14. 7030 | 29. 8150 | 24. 2570 |
| C28 | 16. 8430 | 30. 1710 | 24. 1010 |
| H29 | 16. 7400 | 31. 1440 | 23. 5910 |
| P30 | 22. 4090 | 31. 2860 | 21. 4830 |
| O31 | 23. 5360 | 32. 1570 | 21. 8510 |
| O32 | 21. 8220 | 31. 4590 | 20. 1390 |
| O33 | 22. 8400 | 29. 7510 | 21. 4980 |
| C34 | 23. 5430 | 29. 1750 | 22. 5940 |
| H35 | 24. 5670 | 29. 5840 | 22. 7610 |
| H36 | 23. 1490 | 29. 4510 | 23. 6000 |
| C37 | 23. 4940 | 27. 7090 | 22. 2790 |
| H38 | 24. 2610 | 27. 1840 | 22. 8940 |
| O39 | 22. 1930 | 27. 2520 | 22. 6740 |
| C40 | 23. 6930 | 27. 3250 | 20. 8070 |
| H41 | 23. 9720 | 28. 2330 | 20. 2230 |
| O42 | 24. 7230 | 26. 3200 | 20. 6530 |
| C43 | 22. 2730 | 26. 8850 | 20. 4160 |
| H44 | 21. 6460 | 27. 6880 | 19. 9630 |
| H45 | 22. 2240 | 26. 1950 | 19. 5410 |
| C46 | 21. 7210 | 26. 3040 | 21. 7160 |
| H47 | 22. 0610 | 25. 2610 | 21. 9170 |
| N48 | 20. 2370 | 26. 4700 | 21. 7800 |
| C49 | 19. 5260 | 27. 5840 | 21. 4290 |
| H50 | 19. 9900 | 28. 4960 | 21. 0170 |
| N51 | 18. 2070 | 27. 4550 | 21. 6360 |
| H52 | 17. 4710 | 28. 1370 | 21. 4530 |

|     |          |          |          |
|-----|----------|----------|----------|
| C53 | 18. 0830 | 26. 2120 | 22. 1420 |
| C54 | 16. 9040 | 25. 5250 | 22. 5450 |
| O55 | 15. 7390 | 25. 9160 | 22. 5180 |
| N56 | 17. 1970 | 24. 2790 | 23. 0370 |
| H57 | 16. 4070 | 23. 7130 | 23. 3470 |
| C58 | 18. 4340 | 23. 7170 | 23. 1550 |
| N59 | 18. 5080 | 22. 4560 | 23. 6680 |
| H60 | 19. 4330 | 22. 0360 | 23. 7560 |
| H61 | 17. 6640 | 21. 9640 | 23. 9620 |
| N62 | 19. 5370 | 24. 3600 | 22. 7700 |
| H63 | 20. 4730 | 23. 9610 | 22. 8420 |
| C64 | 19. 2900 | 25. 5940 | 22. 2740 |
| P65 | 25. 0640 | 25. 6210 | 19. 2520 |
| O66 | 26. 5060 | 25. 3160 | 19. 2200 |
| O67 | 24. 5590 | 26. 4120 | 18. 1150 |
| O68 | 24. 2600 | 24. 2460 | 19. 3270 |
| C69 | 24. 5840 | 23. 2850 | 20. 3350 |
| H70 | 25. 6210 | 22. 8830 | 20. 2530 |
| H71 | 24. 6930 | 23. 7250 | 21. 3540 |
| C72 | 23. 5230 | 22. 2330 | 20. 2450 |
| H73 | 23. 6970 | 21. 4650 | 21. 0340 |
| O74 | 22. 2560 | 22. 8440 | 20. 4530 |
| C75 | 23. 4240 | 21. 5570 | 18. 9030 |
| H76 | 23. 8650 | 22. 2160 | 18. 1190 |
| O77 | 24. 1210 | 20. 3090 | 18. 9280 |
| C78 | 21. 9300 | 21. 4060 | 18. 6610 |
| H79 | 21. 6140 | 20. 3660 | 18. 4120 |
| H80 | 21. 5740 | 21. 8760 | 17. 7140 |
| C81 | 21. 2780 | 21. 9660 | 19. 9090 |

|      |          |          |          |
|------|----------|----------|----------|
| H82  | 20. 9480 | 21. 1770 | 20. 6250 |
| N83  | 20. 1960 | 22. 8890 | 19. 5210 |
| C84  | 18. 9090 | 22. 5840 | 19. 8160 |
| O85  | 18. 6850 | 21. 5120 | 20. 3820 |
| N86  | 17. 9350 | 23. 4470 | 19. 5020 |
| H87  | 16. 9670 | 23. 2190 | 19. 7280 |
| C88  | 18. 2170 | 24. 6030 | 18. 8970 |
| N89  | 17. 2210 | 25. 4990 | 18. 6290 |
| H90  | 17. 4360 | 26. 3820 | 18. 1670 |
| H91  | 16. 2620 | 25. 2480 | 18. 8680 |
| C92  | 19. 5260 | 24. 9450 | 18. 5710 |
| H93  | 19. 7550 | 25. 8990 | 18. 0670 |
| C94  | 20. 5370 | 24. 0480 | 18. 8990 |
| H95  | 21. 5900 | 24. 2720 | 18. 6600 |
| P96  | 24. 2490 | 19. 4120 | 17. 6170 |
| O97  | 25. 4200 | 18. 5350 | 17. 7650 |
| O98  | 24. 2080 | 20. 2960 | 16. 4400 |
| O99  | 22. 9310 | 18. 5370 | 17. 6700 |
| C100 | 22. 7140 | 17. 6250 | 18. 7530 |
| H101 | 23. 5510 | 16. 9010 | 18. 8910 |
| H102 | 22. 7800 | 18. 1100 | 19. 7550 |
| C103 | 21. 3930 | 16. 9600 | 18. 5050 |
| H104 | 21. 1940 | 16. 2390 | 19. 3320 |
| O105 | 20. 3530 | 17. 9520 | 18. 4960 |
| C106 | 21. 2640 | 16. 2290 | 17. 1760 |
| H107 | 22. 2460 | 15. 8260 | 16. 8350 |
| O108 | 20. 2840 | 15. 2140 | 17. 2380 |
| C109 | 20. 7930 | 17. 3680 | 16. 2880 |
| H110 | 21. 5660 | 18. 0930 | 15. 9420 |

|      |         |         |         |
|------|---------|---------|---------|
| H111 | 20.4810 | 17.1050 | 15.2510 |
| C112 | 19.7160 | 17.9010 | 17.2180 |
| H113 | 18.8350 | 17.2170 | 17.2400 |
| N114 | 19.3050 | 19.2810 | 16.8690 |
| C115 | 20.0170 | 20.2630 | 16.2320 |
| H116 | 21.0560 | 20.1370 | 15.8840 |
| N117 | 19.3130 | 21.3940 | 16.0770 |
| H118 | 19.6090 | 22.2680 | 15.6410 |
| C119 | 18.1210 | 21.1000 | 16.6350 |
| C120 | 16.9520 | 21.9040 | 16.7490 |
| O121 | 16.7690 | 23.0570 | 16.3680 |
| N122 | 15.9330 | 21.2140 | 17.3520 |
| H123 | 15.0510 | 21.7130 | 17.4670 |
| C124 | 15.9720 | 19.9300 | 17.8160 |
| N125 | 14.8310 | 19.4160 | 18.3530 |
| H126 | 13.9920 | 19.9910 | 18.4290 |
| H127 | 14.8600 | 18.4570 | 18.7000 |
| N128 | 17.0680 | 19.1790 | 17.7170 |
| H129 | 17.1290 | 18.2190 | 18.0560 |
| C130 | 18.0840 | 19.8250 | 17.1210 |
| P131 | 20.3560 | 13.9690 | 16.2450 |
| O132 | 21.1160 | 12.8910 | 16.8920 |
| O133 | 20.8370 | 14.4230 | 14.9100 |
| O134 | 18.8100 | 13.5810 | 16.1610 |
| C135 | 18.0150 | 13.5690 | 17.3620 |
| H136 | 18.4750 | 14.1290 | 18.2100 |
| H137 | 17.9780 | 12.5750 | 17.8650 |
| C138 | 16.6720 | 14.0880 | 16.9570 |
| H139 | 15.9820 | 14.0430 | 17.8310 |



|      |          |          |          |
|------|----------|----------|----------|
| O140 | 16. 8420 | 15. 4470 | 16. 5610 |
| C141 | 16. 0190 | 13. 3930 | 15. 7640 |
| H142 | 16. 7030 | 12. 5910 | 15. 4020 |
| O143 | 14. 7620 | 12. 7960 | 16. 1200 |
| C144 | 15. 9520 | 14. 4980 | 14. 6960 |
| H145 | 15. 1460 | 14. 3810 | 13. 9340 |
| H146 | 16. 7850 | 14. 5010 | 13. 9550 |
| C147 | 15. 8510 | 15. 7320 | 15. 5690 |
| H148 | 14. 8320 | 15. 8940 | 15. 9930 |
| N149 | 16. 3910 | 16. 9160 | 14. 8670 |
| C150 | 17. 6580 | 17. 1030 | 14. 3820 |
| H151 | 18. 4300 | 16. 3150 | 14. 3770 |
| N152 | 17. 8630 | 18. 3460 | 13. 9130 |
| H153 | 18. 7160 | 18. 7370 | 13. 5130 |
| C154 | 16. 6730 | 18. 9530 | 14. 0980 |
| C155 | 16. 2300 | 20. 2790 | 13. 8190 |
| N156 | 17. 0450 | 21. 2220 | 13. 2680 |
| H157 | 16. 7280 | 22. 1710 | 13. 0680 |
| H158 | 18. 0120 | 20. 9930 | 13. 0390 |
| N159 | 14. 9660 | 20. 5780 | 14. 1180 |
| H160 | 14. 6020 | 21. 5110 | 13. 9260 |
| C161 | 14. 1780 | 19. 6520 | 14. 6690 |
| H162 | 13. 1480 | 19. 9770 | 14. 8940 |
| N163 | 14. 4630 | 18. 3920 | 14. 9840 |
| H164 | 13. 8090 | 17. 7330 | 15. 4070 |
| C165 | 15. 7500 | 18. 1100 | 14. 6610 |
| P166 | 13. 8660 | 12. 0060 | 15. 0630 |
| O167 | 13. 0280 | 11. 0390 | 15. 8000 |
| O168 | 14. 7150 | 11. 4990 | 13. 9680 |

|      |          |          |          |
|------|----------|----------|----------|
| 0169 | 12. 8790 | 13. 1110 | 14. 4800 |
| C170 | 11. 8020 | 13. 5970 | 15. 2900 |
| H171 | 12. 1220 | 13. 9890 | 16. 2830 |
| H172 | 11. 1310 | 12. 7970 | 15. 6810 |
| C173 | 11. 1110 | 14. 6030 | 14. 4350 |
| H174 | 10. 3880 | 15. 1890 | 15. 0490 |
| 0175 | 12. 1520 | 15. 4600 | 13. 9620 |
| C176 | 10. 4170 | 14. 0700 | 13. 1870 |
| H177 | 10. 5460 | 12. 9630 | 13. 1530 |
| 0178 | 9. 0070  | 14. 3690 | 13. 1810 |
| C179 | 11. 2400 | 14. 6920 | 12. 0610 |
| H180 | 12. 0500 | 14. 0480 | 11. 6460 |
| H181 | 10. 7080 | 14. 8150 | 11. 0890 |
| C182 | 11. 6990 | 15. 9740 | 12. 7190 |
| H183 | 10. 8830 | 16. 7260 | 12. 8280 |
| N184 | 12. 9180 | 16. 5260 | 12. 0780 |
| C185 | 14. 1150 | 15. 8990 | 11. 8680 |
| H186 | 14. 2940 | 14. 8350 | 12. 0960 |
| N187 | 15. 0490 | 16. 7140 | 11. 3560 |
| H188 | 16. 0120 | 16. 4890 | 11. 1080 |
| C189 | 14. 4160 | 17. 9010 | 11. 2460 |
| C190 | 14. 8730 | 19. 1870 | 10. 8150 |
| N191 | 16. 1610 | 19. 4180 | 10. 4270 |
| H192 | 16. 8300 | 18. 6490 | 10. 3990 |
| H193 | 16. 4870 | 20. 3350 | 10. 1200 |
| N194 | 13. 9990 | 20. 1910 | 10. 8520 |
| H195 | 14. 2800 | 21. 1280 | 10. 5620 |
| C196 | 12. 7530 | 19. 9620 | 11. 2720 |
| H197 | 12. 0810 | 20. 8360 | 11. 2650 |

|      |          |          |          |
|------|----------|----------|----------|
| N198 | 12. 2100 | 18. 8240 | 11. 6980 |
| H199 | 11. 2450 | 18. 7220 | 12. 0120 |
| C200 | 13. 1160 | 17. 8230 | 11. 6570 |
| P201 | 8. 0810  | 14. 0500 | 11. 9150 |
| 0202 | 6. 6680  | 13. 9600 | 12. 3420 |
| 0203 | 8. 6000  | 12. 8940 | 11. 1370 |
| 0204 | 8. 2390  | 15. 3870 | 11. 0760 |
| C205 | 7. 9070  | 16. 6350 | 11. 6860 |
| H206 | 8. 4470  | 16. 8430 | 12. 6390 |
| H207 | 6. 8820  | 16. 6790 | 12. 1230 |
| C208 | 8. 1620  | 17. 6280 | 10. 5980 |
| H209 | 7. 8770  | 18. 6520 | 10. 9330 |
| 0210 | 9. 5430  | 17. 5800 | 10. 2790 |
| C211 | 7. 4610  | 17. 2840 | 9. 2960  |
| H212 | 7. 2070  | 16. 1980 | 9. 3050  |
| 0213 | 6. 2510  | 18. 0340 | 9. 1620  |
| C214 | 8. 5320  | 17. 5270 | 8. 2230  |
| H215 | 8. 8470  | 16. 6180 | 7. 6600  |
| H216 | 8. 1810  | 18. 0920 | 7. 3280  |
| C217 | 9. 6440  | 18. 2090 | 9. 0190  |
| H218 | 9. 4750  | 19. 3080 | 9. 0970  |
| N219 | 11. 0210 | 17. 9030 | 8. 5650  |
| C220 | 11. 8220 | 18. 9230 | 8. 1760  |
| 0221 | 11. 3830 | 20. 0770 | 8. 1430  |
| N222 | 13. 1190 | 18. 6410 | 7. 8520  |
| H223 | 13. 7310 | 19. 4090 | 7. 5760  |
| C224 | 13. 6330 | 17. 3720 | 7. 8820  |
| 0225 | 14. 8300 | 17. 2220 | 7. 6190  |
| C226 | 12. 7810 | 16. 3250 | 8. 2350  |

|      |          |          |         |
|------|----------|----------|---------|
| G227 | 13. 2690 | 14. 9020 | 8. 2360 |
| H228 | 14. 3210 | 14. 6690 | 7. 9490 |
| H229 | 12. 5880 | 14. 2970 | 7. 5940 |
| H230 | 13. 0750 | 14. 4650 | 9. 2430 |
| G231 | 11. 4650 | 16. 6160 | 8. 5940 |
| H232 | 10. 7840 | 15. 8040 | 8. 9010 |
| P233 | 5. 3840  | 17. 9900 | 7. 8240 |
| O234 | 4. 0250  | 18. 4440 | 8. 1800 |
| O235 | 5. 4580  | 16. 6680 | 7. 1600 |
| O236 | 6. 0860  | 19. 1180 | 6. 9270 |
| G237 | 6. 1460  | 20. 4780 | 7. 4180 |
| H238 | 5. 1430  | 20. 9370 | 7. 5830 |
| H239 | 6. 5040  | 20. 5570 | 8. 4710 |
| G240 | 6. 9950  | 21. 2290 | 6. 4380 |
| H241 | 7. 2370  | 22. 2430 | 6. 8330 |
| O242 | 8. 1880  | 20. 4580 | 6. 2840 |
| G243 | 6. 4180  | 21. 3320 | 5. 0290 |
| H244 | 5. 5310  | 20. 6580 | 4. 9810 |
| O245 | 5. 9670  | 22. 6670 | 4. 6960 |
| G246 | 7. 5130  | 20. 7180 | 4. 1390 |
| H247 | 7. 3050  | 19. 6870 | 3. 7700 |
| H248 | 7. 6120  | 21. 1690 | 3. 1240 |
| G249 | 8. 7360  | 20. 8550 | 5. 0340 |
| H250 | 9. 1170  | 21. 9030 | 5. 0610 |
| N251 | 9. 8230  | 19. 8760 | 4. 7590 |
| G252 | 11. 0860 | 20. 3160 | 4. 4940 |
| O253 | 11. 3240 | 21. 5160 | 4. 3890 |
| N254 | 12. 0940 | 19. 4030 | 4. 4120 |
| H255 | 13. 0440 | 19. 7320 | 4. 2410 |

|      |          |          |          |
|------|----------|----------|----------|
| C256 | 11. 8760 | 18. 0600 | 4. 5510  |
| 0257 | 12. 8580 | 17. 3170 | 4. 5030  |
| C258 | 10. 5690 | 17. 6110 | 4. 7650  |
| C259 | 10. 2610 | 16. 1400 | 4. 8960  |
| H260 | 11. 0790 | 15. 3910 | 4. 7850  |
| H261 | 9. 4470  | 15. 8840 | 4. 1790  |
| H262 | 9. 7560  | 15. 9700 | 5. 8750  |
| C263 | 9. 5450  | 18. 5480 | 4. 9040  |
| H264 | 8. 5170  | 18. 2180 | 5. 1300  |
| P265 | 5. 5310  | 23. 0710 | 3. 2090  |
| 0266 | 4. 6480  | 24. 2440 | 3. 2690  |
| 0267 | 5. 0100  | 21. 9050 | 2. 4700  |
| 0268 | 6. 9260  | 23. 5470 | 2. 6110  |
| C269 | 7. 6360  | 24. 6270 | 3. 2490  |
| H270 | 7. 8260  | 24. 4470 | 4. 3330  |
| H271 | 7. 0200  | 25. 5490 | 3. 3640  |
| C272 | 8. 8970  | 24. 8530 | 2. 4570  |
| H273 | 9. 5050  | 25. 6370 | 2. 9650  |
| 0274 | 9. 6380  | 23. 6270 | 2. 4480  |
| C275 | 8. 7170  | 25. 2400 | 0. 9980  |
| H276 | 7. 6360  | 25. 4390 | 0. 8080  |
| 0277 | 9. 4700  | 26. 4140 | 0. 6670  |
| C278 | 9. 1260  | 23. 9650 | 0. 2530  |
| H279 | 8. 3090  | 23. 2330 | 0. 0550  |
| H280 | 9. 3920  | 24. 0930 | -0. 8220 |
| C281 | 10. 2410 | 23. 4830 | 1. 1570  |
| H282 | 11. 1630 | 24. 1010 | 1. 0530  |
| N283 | 10. 5240 | 22. 0220 | 1. 0150  |
| C284 | 11. 8140 | 21. 6030 | 0. 8400  |

|      |          |          |          |
|------|----------|----------|----------|
| 0285 | 12. 6910 | 22. 4470 | 0. 6700  |
| N286 | 12. 1060 | 20. 2970 | 0. 8730  |
| H287 | 13. 0730 | 19. 9910 | 0. 7650  |
| C288 | 11. 1410 | 19. 3950 | 1. 0460  |
| N289 | 11. 4610 | 18. 0750 | 1. 0890  |
| H290 | 12. 4380 | 17. 7980 | 0. 9930  |
| H291 | 10. 7220 | 17. 3840 | 1. 2210  |
| C292 | 9. 8030  | 19. 7750 | 1. 1770  |
| H293 | 9. 0080  | 19. 0180 | 1. 2860  |
| C294 | 9. 4990  | 21. 1330 | 1. 1670  |
| H295 | 8. 4590  | 21. 4820 | 1. 2790  |
| P296 | 9. 0550  | 27. 3330 | -0. 5810 |
| 0297 | 9. 4960  | 28. 7170 | -0. 2580 |
| 0298 | 7. 6320  | 27. 1060 | -0. 9470 |
| 0299 | 9. 9540  | 26. 7650 | -1. 7710 |
| C300 | 11. 3820 | 26. 9400 | -1. 7200 |
| H301 | 11. 8120 | 26. 7260 | -0. 7140 |
| H302 | 11. 6930 | 28. 0090 | -1. 7860 |
| C303 | 11. 9720 | 26. 0900 | -2. 8020 |
| H304 | 13. 0610 | 26. 3130 | -2. 8900 |
| 0305 | 11. 8020 | 24. 7240 | -2. 4040 |
| C306 | 11. 3270 | 26. 1780 | -4. 1880 |
| H307 | 10. 7330 | 27. 1160 | -4. 2870 |
| 0308 | 12. 3110 | 26. 0960 | -5. 2140 |
| C309 | 10. 4140 | 24. 9620 | -4. 1860 |
| H310 | 9. 4270  | 25. 0540 | -3. 6750 |
| H311 | 9. 9410  | 24. 6660 | -5. 1510 |
| C312 | 11. 4290 | 24. 0280 | -3. 5870 |
| H313 | 12. 3050 | 23. 9100 | -4. 2670 |

|      |          |          |          |
|------|----------|----------|----------|
| N314 | 10. 8900 | 22. 7130 | -3. 2000 |
| C315 | 9. 6160  | 22. 3150 | -2. 9100 |
| H316 | 8. 7450  | 22. 9920 | -2. 9190 |
| N317 | 9. 5410  | 21. 0090 | -2. 6130 |
| H318 | 8. 7150  | 20. 4640 | -2. 3660 |
| C319 | 10. 8180 | 20. 5880 | -2. 7180 |
| C320 | 11. 3760 | 19. 2920 | -2. 5110 |
| O321 | 10. 8130 | 18. 2520 | -2. 1790 |
| N322 | 12. 7290 | 19. 2990 | -2. 7200 |
| H323 | 13. 2140 | 18. 4110 | -2. 5910 |
| C324 | 13. 4980 | 20. 3650 | -3. 0820 |
| N325 | 14. 8340 | 20. 1690 | -3. 2370 |
| H326 | 15. 2310 | 19. 2400 | -3. 0950 |
| H327 | 15. 4090 | 20. 9670 | -3. 5080 |
| N328 | 12. 9820 | 21. 5730 | -3. 2670 |
| H329 | 13. 5310 | 22. 3890 | -3. 5360 |
| C330 | 11. 6560 | 21. 6010 | -3. 0610 |
| P331 | 12. 7630 | 27. 4210 | -5. 9800 |
| O332 | 12. 7960 | 28. 5720 | -5. 0490 |
| O333 | 11. 8860 | 27. 5420 | -7. 1640 |
| O334 | 14. 2720 | 27. 0860 | -6. 3660 |
| C335 | 15. 2750 | 27. 1080 | -5. 3180 |
| H336 | 14. 8220 | 27. 1200 | -4. 2990 |
| H337 | 15. 8100 | 28. 0850 | -5. 2650 |
| C338 | 16. 2220 | 25. 9460 | -5. 5100 |
| H339 | 16. 9800 | 25. 9600 | -4. 6930 |
| O340 | 15. 4430 | 24. 7540 | -5. 3970 |
| C341 | 16. 9420 | 25. 8270 | -6. 8480 |
| H342 | 16. 8480 | 26. 7950 | -7. 3940 |

|      |         |         |         |
|------|---------|---------|---------|
| 0343 | 18.3400 | 25.5110 | -6.7010 |
| C344 | 16.1180 | 24.7670 | -7.5780 |
| H345 | 15.2210 | 25.1320 | -8.1310 |
| H346 | 16.5870 | 24.3110 | -8.4810 |
| C347 | 15.8560 | 23.8360 | -6.4140 |
| H348 | 16.7600 | 23.2520 | -6.1220 |
| N349 | 14.6720 | 22.9750 | -6.6370 |
| C350 | 14.8020 | 21.6280 | -6.5290 |
| 0351 | 15.9240 | 21.1780 | -6.3140 |
| N352 | 13.7230 | 20.8420 | -6.6270 |
| H353 | 13.8240 | 19.8310 | -6.5420 |
| C354 | 12.5150 | 21.3730 | -6.8360 |
| N355 | 11.4100 | 20.5740 | -6.8720 |
| H356 | 10.4880 | 20.9790 | -7.0320 |
| H357 | 11.5330 | 19.5670 | -6.7680 |
| C358 | 12.3480 | 22.7440 | -6.9780 |
| H359 | 11.3520 | 23.1760 | -7.1720 |
| C360 | 13.4700 | 23.5580 | -6.8690 |
| H361 | 13.3840 | 24.6530 | -6.9690 |
| P362 | 19.3310 | 25.7740 | -7.9250 |
| 0363 | 20.7040 | 25.9760 | -7.4080 |
| 0364 | 18.7630 | 26.8510 | -8.7580 |
| 0365 | 19.3020 | 24.4120 | -8.7630 |
| C366 | 20.1090 | 23.2840 | -8.3590 |
| H367 | 21.2010 | 23.5050 | -8.3270 |
| H368 | 19.9950 | 23.0160 | -7.2830 |
| C369 | 19.7480 | 22.1670 | -9.2990 |
| H370 | 20.2920 | 21.2400 | -9.0020 |
| 0371 | 18.3500 | 21.9690 | -9.1390 |



|      |          |          |           |
|------|----------|----------|-----------|
| C372 | 19. 9210 | 22. 4040 | -10. 8150 |
| H373 | 20. 1230 | 23. 4870 | -10. 9890 |
| 0374 | 20. 9850 | 21. 6350 | -11. 4010 |
| H375 | 21. 0910 | 21. 7810 | -12. 3340 |
| C376 | 18. 5350 | 22. 0620 | -11. 3810 |
| H377 | 17. 9100 | 22. 9370 | -11. 6740 |
| H378 | 18. 5350 | 21. 5960 | -12. 3940 |
| C379 | 17. 9650 | 21. 2000 | -10. 2690 |
| H380 | 18. 3870 | 20. 1680 | -10. 2580 |
| N381 | 16. 4930 | 21. 2200 | -10. 2650 |
| C382 | 15. 6630 | 22. 2890 | -10. 4780 |
| H383 | 16. 0210 | 23. 3090 | -10. 6980 |
| N384 | 14. 3680 | 21. 9580 | -10. 3900 |
| H385 | 13. 5550 | 22. 5620 | -10. 5120 |
| C386 | 14. 3880 | 20. 6400 | -10. 1020 |
| C387 | 13. 3010 | 19. 7420 | -9. 8560  |
| 0388 | 12. 0910 | 19. 9670 | -9. 8570  |
| N389 | 13. 7500 | 18. 4660 | -9. 6250  |
| H390 | 13. 0370 | 17. 7580 | -9. 4490  |
| C391 | 15. 0420 | 18. 0430 | -9. 6050  |
| N392 | 15. 2590 | 16. 7170 | -9. 4060  |
| H393 | 14. 4800 | 16. 0740 | -9. 2630  |
| H394 | 16. 2280 | 16. 4000 | -9. 3910  |
| N395 | 16. 0610 | 18. 8850 | -9. 7920  |
| H396 | 17. 0400 | 18. 6000 | -9. 7610  |
| C397 | 15. 6600 | 20. 1560 | -10. 0270 |
| 0398 | 7. 4580  | 11. 8840 | -9. 0700  |
| H399 | 6. 5390  | 11. 7750 | -9. 2850  |
| G400 | 8. 2520  | 10. 9680 | -9. 8540  |

|      |         |         |          |
|------|---------|---------|----------|
| H401 | 8.0610  | 11.0760 | -10.9470 |
| H402 | 7.9150  | 9.9120  | -9.7350  |
| C403 | 9.7140  | 11.1410 | -9.5120  |
| H404 | 10.2960 | 10.3960 | -10.1030 |
| O405 | 10.1440 | 12.4550 | -9.9080  |
| C406 | 10.1030 | 10.9890 | -8.0550  |
| H407 | 9.2700  | 10.5060 | -7.4920  |
| O408 | 11.2930 | 10.2210 | -7.9040  |
| C409 | 10.2540 | 12.4370 | -7.6070  |
| H410 | 10.8060 | 12.5900 | -6.6500  |
| H411 | 9.3190  | 12.9330 | -7.2570  |
| C412 | 10.8960 | 13.0440 | -8.8370  |
| H413 | 11.9890 | 12.8350 | -8.9060  |
| N414 | 10.5750 | 14.4870 | -8.9440  |
| C415 | 11.5590 | 15.4300 | -9.0060  |
| O416 | 12.7250 | 15.0660 | -8.9320  |
| N417 | 11.2460 | 16.7140 | -9.1930  |
| H418 | 11.9870 | 17.4150 | -9.2280  |
| C419 | 9.9800  | 17.0880 | -9.3340  |
| N420 | 9.6980  | 18.3950 | -9.5890  |
| H421 | 8.7250  | 18.6820 | -9.6970  |
| H422 | 10.4590 | 19.0720 | -9.6330  |
| C423 | 8.9390  | 16.1620 | -9.2740  |
| H424 | 7.8880  | 16.4810 | -9.3770  |
| C425 | 9.2650  | 14.8240 | -9.0800  |
| H426 | 8.4780  | 14.0530 | -9.0370  |
| P427 | 11.6020 | 9.5100  | -6.5020  |
| O428 | 11.6660 | 8.0320  | -6.6640  |
| O429 | 10.6440 | 10.0100 | -5.4940  |

|      |         |         |         |
|------|---------|---------|---------|
| 0430 | 13.0510 | 10.0940 | -6.1770 |
| G431 | 14.1000 | 10.0210 | -7.1560 |
| H432 | 13.7660 | 10.2010 | -8.2040 |
| H433 | 14.4940 | 8.9930  | -7.3340 |
| G434 | 15.1130 | 10.9920 | -6.6570 |
| H435 | 16.0420 | 10.9250 | -7.2700 |
| 0436 | 14.5560 | 12.3000 | -6.7550 |
| G437 | 15.4450 | 10.8060 | -5.1890 |
| H438 | 14.8670 | 9.9400  | -4.7900 |
| 0439 | 16.8360 | 10.5600 | -5.0130 |
| G440 | 14.9370 | 12.1000 | -4.5290 |
| H441 | 13.9260 | 12.0320 | -4.0630 |
| H442 | 15.4610 | 12.3930 | -3.5890 |
| G443 | 15.0580 | 13.0860 | -5.6710 |
| H444 | 16.0920 | 13.4730 | -5.8300 |
| N445 | 14.0360 | 14.1400 | -5.5360 |
| G446 | 12.7100 | 13.9570 | -5.2590 |
| H447 | 12.2600 | 12.9720 | -5.0500 |
| N448 | 12.0160 | 15.1030 | -5.2690 |
| H449 | 11.0190 | 15.2340 | -5.0970 |
| G450 | 12.9370 | 16.0410 | -5.5580 |
| G451 | 12.7610 | 17.4510 | -5.7100 |
| 0452 | 11.7230 | 18.1110 | -5.6300 |
| N453 | 13.9520 | 18.0790 | -5.9730 |
| H454 | 13.9220 | 19.0930 | -6.0790 |
| G455 | 15.1710 | 17.4850 | -6.1070 |
| N456 | 16.2440 | 18.2920 | -6.3250 |
| H457 | 16.1240 | 19.3010 | -6.4170 |
| H458 | 17.1560 | 17.8470 | -6.4250 |

|      |         |         |         |
|------|---------|---------|---------|
| N459 | 15.3290 | 16.1610 | -5.9860 |
| H460 | 16.2310 | 15.6950 | -6.0840 |
| C461 | 14.1790 | 15.4990 | -5.7210 |
| P462 | 17.4780 | 10.3800 | -3.5690 |
| 0463 | 18.6650 | 9.5160  | -3.7290 |
| 0464 | 16.4270 | 9.9400  | -2.6330 |
| 0465 | 17.9570 | 11.8650 | -3.2080 |
| C466 | 18.9630 | 12.5310 | -3.9960 |
| H467 | 18.8290 | 12.4090 | -5.0960 |
| H468 | 19.9700 | 12.0570 | -3.9360 |
| C469 | 18.9360 | 13.9580 | -3.5360 |
| H470 | 19.6060 | 14.5890 | -4.1660 |
| 0471 | 17.5920 | 14.4090 | -3.6220 |
| C472 | 19.2530 | 14.1390 | -2.0660 |
| H473 | 18.8290 | 13.2910 | -1.4790 |
| 0474 | 20.6590 | 14.2190 | -1.8580 |
| C475 | 18.5200 | 15.4170 | -1.7280 |
| H476 | 18.0460 | 15.4180 | -0.7190 |
| H477 | 19.1870 | 16.2930 | -1.5500 |
| C478 | 17.5450 | 15.6020 | -2.8720 |
| H479 | 17.8260 | 16.4800 | -3.4990 |
| N480 | 16.1450 | 15.6960 | -2.4280 |
| C481 | 15.5070 | 16.8860 | -2.5580 |
| 0482 | 16.1620 | 17.8460 | -2.9570 |
| N483 | 14.2090 | 16.9830 | -2.2640 |
| H484 | 13.7290 | 17.8760 | -2.3760 |
| C485 | 13.5360 | 15.9190 | -1.8250 |
| N486 | 12.2050 | 16.0170 | -1.5530 |
| H487 | 11.7450 | 16.9180 | -1.6800 |

|      |          |          |          |
|------|----------|----------|----------|
| H488 | 11. 6900 | 15. 2030 | -1. 2170 |
| C489 | 14. 1640 | 14. 6890 | -1. 6520 |
| H490 | 13. 6070 | 13. 8190 | -1. 2650 |
| C491 | 15. 5090 | 14. 5840 | -1. 9790 |
| H492 | 16. 0450 | 13. 6250 | -1. 8770 |
| P493 | 21. 3040 | 14. 5290 | -0. 4360 |
| 0494 | 22. 6960 | 14. 0870 | -0. 5240 |
| 0495 | 20. 4880 | 13. 9540 | 0. 6500  |
| 0496 | 21. 3060 | 16. 1170 | -0. 3630 |
| C497 | 22. 1770 | 16. 8760 | -1. 2120 |
| H498 | 22. 1840 | 16. 5400 | -2. 2750 |
| H499 | 23. 2620 | 16. 7050 | -1. 0220 |
| C500 | 21. 7390 | 18. 2920 | -1. 0210 |
| H501 | 22. 1020 | 18. 9150 | -1. 8710 |
| 0502 | 20. 3050 | 18. 2250 | -1. 0480 |
| C503 | 22. 1010 | 18. 9590 | 0. 2930  |
| H504 | 22. 9010 | 18. 3580 | 0. 7850  |
| 0505 | 22. 5920 | 20. 2930 | 0. 0970  |
| C506 | 20. 8200 | 18. 8290 | 1. 1210  |
| H507 | 20. 7330 | 19. 5310 | 1. 9830  |
| H508 | 20. 7410 | 17. 9050 | 1. 7400  |
| C509 | 19. 7650 | 18. 9850 | 0. 0460  |
| H510 | 19. 5920 | 20. 0530 | -0. 2250 |
| N511 | 18. 5130 | 18. 2990 | 0. 4680  |
| C512 | 18. 3630 | 17. 0620 | 1. 0390  |
| H513 | 19. 2090 | 16. 3950 | 1. 2760  |
| N514 | 17. 0800 | 16. 7440 | 1. 2810  |
| H515 | 16. 7090 | 15. 8830 | 1. 6820  |
| C516 | 16. 4000 | 17. 8320 | 0. 8680  |

|      |         |         |         |
|------|---------|---------|---------|
| C517 | 14.9960 | 18.0900 | 0.8820  |
| 0518 | 14.0820 | 17.3780 | 1.2800  |
| N519 | 14.7120 | 19.3490 | 0.4180  |
| H520 | 13.7290 | 19.6220 | 0.4060  |
| C521 | 15.6060 | 20.2680 | -0.0270 |
| N522 | 15.1340 | 21.4930 | -0.3820 |
| H523 | 14.1330 | 21.6850 | -0.3480 |
| H524 | 15.8060 | 22.1840 | -0.7160 |
| N525 | 16.9120 | 20.0170 | -0.0720 |
| H526 | 17.6000 | 20.6860 | -0.4180 |
| C527 | 17.2360 | 18.7940 | 0.3840  |
| P528 | 22.9040 | 21.2380 | 1.3390  |
| 0529 | 23.9940 | 22.1830 | 1.0250  |
| 0530 | 23.1040 | 20.3900 | 2.5380  |
| 0531 | 21.5770 | 22.1070 | 1.3900  |
| C532 | 21.2160 | 22.8330 | 0.2000  |
| H533 | 20.9690 | 22.1480 | -0.6440 |
| H534 | 22.0950 | 23.3470 | -0.2540 |
| C535 | 20.1010 | 23.7880 | 0.4840  |
| H536 | 19.9030 | 24.3850 | -0.4370 |
| 0537 | 18.9130 | 23.0540 | 0.8160  |
| C538 | 20.3470 | 24.7430 | 1.6330  |
| H539 | 21.4430 | 24.8760 | 1.7880  |
| 0540 | 19.7320 | 26.0100 | 1.4110  |
| C541 | 19.7520 | 23.9450 | 2.7910  |
| H542 | 19.5940 | 24.5160 | 3.7360  |
| H543 | 20.4290 | 23.1870 | 3.2490  |
| C544 | 18.4970 | 23.3930 | 2.1450  |
| H545 | 17.6680 | 24.1380 | 2.1440  |

|      |         |         |        |
|------|---------|---------|--------|
| N546 | 18.0790 | 22.0950 | 2.7580 |
| C547 | 18.8470 | 21.0200 | 3.1330 |
| H548 | 19.9480 | 21.0060 | 3.0710 |
| N549 | 18.1140 | 19.9840 | 3.5840 |
| H550 | 18.4430 | 19.0790 | 3.9200 |
| C551 | 16.8420 | 20.4240 | 3.4880 |
| C552 | 15.5770 | 19.8170 | 3.7860 |
| N553 | 15.4480 | 18.5370 | 4.2420 |
| H554 | 16.2840 | 17.9720 | 4.3890 |
| H555 | 14.5480 | 18.1050 | 4.4540 |
| N556 | 14.4820 | 20.5570 | 3.5930 |
| H557 | 13.5610 | 20.1740 | 3.8070 |
| C558 | 14.5970 | 21.8010 | 3.1180 |
| H559 | 13.6490 | 22.3480 | 2.9850 |
| N560 | 15.7000 | 22.4720 | 2.7830 |
| H561 | 15.7170 | 23.4230 | 2.4160 |
| C562 | 16.7910 | 21.7060 | 3.0020 |
| P563 | 19.8030 | 27.1410 | 2.5260 |
| O564 | 19.7960 | 28.4780 | 1.8880 |
| O565 | 20.9530 | 26.8580 | 3.4260 |
| O566 | 18.3960 | 26.9390 | 3.2410 |
| C567 | 17.2030 | 27.0280 | 2.4520 |
| H568 | 17.1590 | 26.2610 | 1.6440 |
| H569 | 17.1820 | 27.9310 | 1.7980 |
| C570 | 16.0350 | 26.9580 | 3.3880 |
| H571 | 15.1240 | 27.2400 | 2.8110 |
| O572 | 15.8560 | 25.6120 | 3.8500 |
| C573 | 16.1010 | 27.8610 | 4.6150 |
| H574 | 16.9670 | 28.5580 | 4.5250 |

|      |          |          |         |
|------|----------|----------|---------|
| 0575 | 14. 8900 | 28. 6080 | 4. 7570 |
| C576 | 16. 3680 | 26. 8440 | 5. 7240 |
| H577 | 16. 1320 | 27. 1930 | 6. 7560 |
| H578 | 17. 4440 | 26. 6370 | 5. 9310 |
| C579 | 15. 5610 | 25. 6550 | 5. 2430 |
| H580 | 14. 4700 | 25. 7690 | 5. 4460 |
| N581 | 16. 1040 | 24. 3730 | 5. 7550 |
| C582 | 17. 4110 | 23. 9670 | 5. 8300 |
| H583 | 18. 2660 | 24. 6070 | 5. 5540 |
| N584 | 17. 5390 | 22. 7060 | 6. 2760 |
| H585 | 18. 3970 | 22. 1740 | 6. 4250 |
| C586 | 16. 2660 | 22. 3090 | 6. 4800 |
| C587 | 15. 7150 | 21. 0730 | 6. 9330 |
| N588 | 16. 4830 | 19. 9940 | 7. 2430 |
| H589 | 16. 0890 | 19. 1110 | 7. 5670 |
| H590 | 17. 4980 | 20. 0540 | 7. 1640 |
| N591 | 14. 3890 | 20. 9940 | 7. 0360 |
| H592 | 13. 9520 | 20. 1330 | 7. 3650 |
| C593 | 13. 6360 | 22. 0410 | 6. 7080 |
| H594 | 12. 5480 | 21. 9000 | 6. 8190 |
| N595 | 14. 0190 | 23. 2340 | 6. 2650 |
| H596 | 13. 3860 | 23. 9980 | 6. 0270 |
| C597 | 15. 3670 | 23. 2910 | 6. 1740 |
| P598 | 14. 6040 | 29. 5450 | 6. 0200 |
| 0599 | 13. 7920 | 30. 6960 | 5. 5820 |
| 0600 | 15. 8520 | 29. 8360 | 6. 7490 |
| 0601 | 13. 6330 | 28. 6280 | 6. 8850 |
| C602 | 12. 3980 | 28. 1710 | 6. 3030 |
| H603 | 11. 7080 | 28. 9970 | 6. 0120 |



|      |          |          |          |
|------|----------|----------|----------|
| H604 | 12. 5180 | 27. 7340 | 5. 2840  |
| C605 | 11. 8090 | 27. 2170 | 7. 3020  |
| H606 | 10. 8760 | 26. 7710 | 6. 8850  |
| O607 | 12. 7670 | 26. 1840 | 7. 5340  |
| C608 | 11. 5150 | 27. 8220 | 8. 6690  |
| H609 | 11. 9750 | 28. 8370 | 8. 7140  |
| O610 | 10. 1030 | 27. 9520 | 8. 8910  |
| C611 | 12. 2670 | 26. 9060 | 9. 6300  |
| H612 | 11. 7810 | 26. 7600 | 10. 6230 |
| H613 | 13. 2150 | 27. 3260 | 10. 0390 |
| C614 | 12. 4260 | 25. 6450 | 8. 7990  |
| H615 | 11. 4930 | 25. 0350 | 8. 7660  |
| N616 | 13. 6090 | 24. 8500 | 9. 2050  |
| C617 | 13. 4420 | 23. 5750 | 9. 6560  |
| O618 | 12. 3110 | 23. 1010 | 9. 8020  |
| N619 | 14. 5510 | 22. 8250 | 9. 9130  |
| H620 | 14. 4320 | 21. 8590 | 10. 2180 |
| C621 | 15. 8150 | 23. 3210 | 9. 7770  |
| O622 | 16. 7550 | 22. 5700 | 10. 0290 |
| C623 | 15. 9720 | 24. 6470 | 9. 3620  |
| C624 | 17. 3450 | 25. 2390 | 9. 2340  |
| H625 | 17. 4700 | 26. 2960 | 8. 9030  |
| H626 | 17. 9480 | 24. 5860 | 8. 5610  |
| H627 | 17. 8760 | 25. 1090 | 10. 2060 |
| C628 | 14. 8440 | 25. 4050 | 9. 0480  |
| H629 | 14. 9500 | 26. 4390 | 8. 6780  |
| P630 | 9. 5130  | 28. 5330 | 10. 2600 |
| O631 | 8. 1450  | 29. 0070 | 9. 9980  |
| O632 | 10. 4550 | 29. 5130 | 10. 8410 |

|      |          |          |          |
|------|----------|----------|----------|
| 0633 | 9. 3950  | 27. 2230 | 11. 1530 |
| C634 | 8. 5760  | 26. 1480 | 10. 6640 |
| H635 | 7. 5310  | 26. 4600 | 10. 4320 |
| H636 | 8. 8530  | 25. 8150 | 9. 6370  |
| C637 | 8. 6550  | 25. 0600 | 11. 6780 |
| H638 | 8. 0090  | 24. 2110 | 11. 3550 |
| 0639 | 10. 0030 | 24. 6150 | 11. 7640 |
| C640 | 8. 2720  | 25. 4710 | 13. 0870 |
| H641 | 7. 9620  | 26. 5420 | 13. 0950 |
| 0642 | 7. 1990  | 24. 6570 | 13. 5530 |
| C643 | 9. 5860  | 25. 3070 | 13. 8600 |
| H644 | 9. 4910  | 25. 1650 | 14. 9620 |
| H645 | 10. 2200 | 26. 2200 | 13. 9460 |
| C646 | 10. 1900 | 24. 1480 | 13. 0890 |
| H647 | 9. 6820  | 23. 1760 | 13. 2880 |
| N648 | 11. 6600 | 24. 0700 | 13. 2050 |
| C649 | 12. 2570 | 22. 8800 | 13. 4860 |
| 0650 | 11. 5830 | 21. 8660 | 13. 6910 |
| N651 | 13. 6200 | 22. 8290 | 13. 4970 |
| H652 | 14. 0740 | 21. 9430 | 13. 7180 |
| C653 | 14. 4020 | 23. 9140 | 13. 2250 |
| 0654 | 15. 6250 | 23. 7640 | 13. 2520 |
| C655 | 13. 7740 | 25. 1260 | 12. 9330 |
| C656 | 14. 5630 | 26. 3580 | 12. 6120 |
| H657 | 14. 0610 | 27. 3260 | 12. 3790 |
| H658 | 15. 2500 | 26. 1150 | 11. 7680 |
| H659 | 15. 2790 | 26. 5350 | 13. 4490 |
| C660 | 12. 3850 | 25. 1870 | 12. 9260 |
| H661 | 11. 8730 | 26. 1360 | 12. 6950 |

|      |          |          |          |
|------|----------|----------|----------|
| P662 | 6. 5940  | 24. 8230 | 15. 0160 |
| 0663 | 5. 1690  | 24. 4240 | 14. 9870 |
| 0664 | 6. 8700  | 26. 1890 | 15. 5110 |
| 0665 | 7. 4090  | 23. 7310 | 15. 8390 |
| C666 | 7. 3310  | 22. 3520 | 15. 4330 |
| H667 | 6. 2890  | 21. 9830 | 15. 2900 |
| H668 | 7. 6770  | 22. 1700 | 14. 3890 |
| C669 | 8. 1000  | 21. 5980 | 16. 4610 |
| H670 | 7. 9250  | 20. 5020 | 16. 3490 |
| 0671 | 9. 4780  | 21. 9020 | 16. 2630 |
| C672 | 7. 7660  | 22. 0450 | 17. 8790 |
| H673 | 7. 1410  | 22. 9670 | 17. 8220 |
| 0674 | 7. 0360  | 21. 0410 | 18. 6110 |
| C675 | 9. 1230  | 22. 4140 | 18. 4690 |
| H676 | 9. 2520  | 22. 1410 | 19. 5420 |
| H677 | 9. 2860  | 23. 5080 | 18. 6090 |
| C678 | 10. 1070 | 21. 7430 | 17. 5230 |
| H679 | 10. 3180 | 20. 6790 | 17. 7830 |
| N680 | 11. 3280 | 22. 5560 | 17. 3310 |
| C681 | 12. 5340 | 21. 9390 | 17. 3290 |
| 0682 | 12. 5600 | 20. 7310 | 17. 5790 |
| N683 | 13. 6390 | 22. 6390 | 17. 0350 |
| H684 | 14. 5470 | 22. 1750 | 17. 0380 |
| C685 | 13. 5600 | 23. 9380 | 16. 7390 |
| N686 | 14. 6850 | 24. 6280 | 16. 4040 |
| H687 | 14. 6250 | 25. 6210 | 16. 1780 |
| H688 | 15. 5790 | 24. 1370 | 16. 4060 |
| C689 | 12. 3380 | 24. 6090 | 16. 7360 |
| H690 | 12. 2810 | 25. 6860 | 16. 5040 |

|      |          |          |          |
|------|----------|----------|----------|
| C691 | 11. 1930 | 23. 8780 | 17. 0350 |
| H692 | 10. 2000 | 24. 3580 | 17. 0320 |
| P693 | 6. 5090  | 21. 3240 | 20. 0990 |
| 0694 | 5. 3870  | 20. 3970 | 20. 3960 |
| 0695 | 6. 2350  | 22. 7740 | 20. 3060 |
| 0696 | 7. 7670  | 20. 9240 | 20. 9930 |
| C697 | 8. 2160  | 19. 5590 | 21. 0730 |
| H698 | 7. 4190  | 18. 8510 | 21. 3990 |
| H699 | 8. 4110  | 19. 0990 | 20. 0760 |
| C700 | 9. 4220  | 19. 5570 | 21. 9770 |
| H701 | 9. 7380  | 18. 5030 | 22. 1570 |
| 0702 | 10. 4930 | 20. 2600 | 21. 3190 |
| C703 | 9. 2670  | 20. 2670 | 23. 3250 |
| H704 | 8. 2010  | 20. 2780 | 23. 6520 |
| 0705 | 10. 0880 | 19. 6570 | 24. 2930 |
| C706 | 9. 7510  | 21. 6700 | 22. 9900 |
| H707 | 9. 8790  | 22. 3880 | 23. 8330 |
| H708 | 9. 0460  | 22. 3460 | 22. 4530 |
| C709 | 10. 9880 | 21. 2260 | 22. 2560 |
| H710 | 11. 7180 | 20. 7590 | 22. 9570 |
| N711 | 11. 5990 | 22. 3570 | 21. 5430 |
| C712 | 11. 0370 | 23. 5450 | 21. 1590 |
| H713 | 9. 9760  | 23. 8020 | 21. 3190 |
| N714 | 11. 9210 | 24. 3620 | 20. 5660 |
| H715 | 11. 7620 | 25. 2980 | 20. 1930 |
| C716 | 13. 0720 | 23. 6530 | 20. 5800 |
| C717 | 14. 3700 | 24. 0030 | 20. 1020 |
| 0718 | 14. 7470 | 25. 0570 | 19. 5850 |
| N719 | 15. 2680 | 22. 9830 | 20. 3080 |

|      |          |          |          |
|------|----------|----------|----------|
| H720 | 16. 2230 | 23. 1480 | 19. 9890 |
| C721 | 15. 0230 | 21. 7760 | 20. 8910 |
| N722 | 16. 0660 | 20. 9140 | 21. 0380 |
| H723 | 15. 8830 | 20. 0100 | 21. 4740 |
| H724 | 16. 9910 | 21. 1620 | 20. 6870 |
| N725 | 13. 8150 | 21. 4520 | 21. 3500 |
| H726 | 13. 6020 | 20. 5630 | 21. 8030 |
| C727 | 12. 9020 | 22. 4290 | 21. 1510 |
| P728 | 9. 4770  | 18. 6270 | 25. 3400 |
| 0729 | 8. 7670  | 17. 5340 | 24. 6270 |
| 0730 | 8. 6700  | 19. 4090 | 26. 3120 |
| 0731 | 10. 8070 | 18. 0670 | 26. 0340 |
| C732 | 11. 6880 | 17. 1700 | 25. 3100 |
| H733 | 11. 4610 | 17. 1340 | 24. 2190 |
| H734 | 11. 4920 | 16. 0970 | 25. 5410 |
| C735 | 13. 1150 | 17. 5730 | 25. 5930 |
| H736 | 13. 8180 | 16. 8040 | 25. 1950 |
| 0737 | 13. 2840 | 18. 8040 | 24. 8930 |
| C738 | 13. 4410 | 17. 8790 | 27. 0590 |
| H739 | 12. 4840 | 17. 8580 | 27. 6300 |
| 0740 | 14. 3410 | 16. 9380 | 27. 6770 |
| C741 | 13. 9280 | 19. 3220 | 27. 0250 |
| H742 | 14. 7350 | 19. 5610 | 27. 7560 |
| H743 | 13. 2010 | 20. 0710 | 27. 4170 |
| C744 | 14. 3120 | 19. 5080 | 25. 5680 |
| H745 | 15. 3290 | 19. 1130 | 25. 3360 |
| N746 | 14. 1440 | 20. 9320 | 25. 1700 |
| C747 | 15. 1990 | 21. 5950 | 24. 6300 |
| 0748 | 16. 2570 | 20. 9840 | 24. 5040 |

|      |          |          |          |
|------|----------|----------|----------|
| N749 | 15. 0670 | 22. 8770 | 24. 2570 |
| H750 | 15. 8640 | 23. 3730 | 23. 8580 |
| C751 | 13. 8980 | 23. 5100 | 24. 4040 |
| N752 | 13. 7710 | 24. 8130 | 24. 0180 |
| H753 | 14. 5770 | 25. 2840 | 23. 6070 |
| H754 | 12. 8790 | 25. 2960 | 24. 1300 |
| C755 | 12. 7950 | 22. 8660 | 24. 9670 |
| H756 | 11. 8370 | 23. 3960 | 25. 0970 |
| C757 | 12. 9350 | 21. 5400 | 25. 3590 |
| H758 | 12. 0910 | 20. 9920 | 25. 8110 |
| P759 | 14. 6580 | 17. 0640 | 29. 2470 |
| 0760 | 14. 8630 | 15. 7170 | 29. 8250 |
| 0761 | 13. 6330 | 17. 9120 | 29. 9200 |
| 0762 | 16. 0330 | 17. 8800 | 29. 2840 |
| C763 | 17. 2430 | 17. 3200 | 28. 7420 |
| H764 | 17. 1190 | 16. 8380 | 27. 7440 |
| H765 | 17. 6040 | 16. 4080 | 29. 2720 |
| C766 | 18. 2080 | 18. 4640 | 28. 7580 |
| H767 | 19. 2330 | 18. 1260 | 28. 4770 |
| 0768 | 17. 7160 | 19. 4280 | 27. 8290 |
| C769 | 18. 2300 | 19. 2360 | 30. 0580 |
| H770 | 17. 1900 | 19. 4390 | 30. 4060 |
| 0771 | 18. 9780 | 18. 5830 | 31. 0840 |
| H772 | 18. 9920 | 19. 0680 | 31. 9010 |
| C773 | 18. 8850 | 20. 5190 | 29. 5780 |
| H774 | 20. 0000 | 20. 5180 | 29. 6070 |
| H775 | 18. 7620 | 21. 3940 | 30. 2590 |
| C776 | 18. 2760 | 20. 6930 | 28. 1880 |
| H777 | 19. 0670 | 20. 9830 | 27. 4570 |

|      |          |          |          |
|------|----------|----------|----------|
| N778 | 17. 1640 | 21. 6590 | 28. 1390 |
| C779 | 15. 8740 | 21. 5360 | 28. 5800 |
| H780 | 15. 4900 | 20. 6440 | 29. 1030 |
| N781 | 15. 1290 | 22. 6140 | 28. 3080 |
| H782 | 14. 1460 | 22. 7750 | 28. 5280 |
| C783 | 15. 9900 | 23. 4360 | 27. 6730 |
| C784 | 15. 7650 | 24. 7290 | 27. 1170 |
| O785 | 14. 7190 | 25. 3730 | 27. 0670 |
| N786 | 16. 9260 | 25. 2570 | 26. 6040 |
| H787 | 16. 8610 | 26. 1910 | 26. 1980 |
| C788 | 18. 1570 | 24. 6660 | 26. 5790 |
| N789 | 19. 2080 | 25. 3860 | 26. 0960 |
| H790 | 19. 0600 | 26. 3280 | 25. 7330 |
| H791 | 20. 1270 | 24. 9450 | 26. 0770 |
| N792 | 18. 3500 | 23. 4380 | 27. 0530 |
| H793 | 19. 2500 | 22. 9590 | 27. 0280 |
| C794 | 17. 2310 | 22. 8930 | 27. 5700 |
| C795 | 11. 0030 | 26. 2350 | 4. 3070  |
| C796 | 12. 4670 | 27. 0300 | 2. 5370  |
| H797 | 13. 3480 | 26. 7910 | 1. 9550  |
| C798 | 11. 7100 | 28. 1580 | 2. 4150  |
| H799 | 11. 9830 | 28. 9010 | 1. 6750  |
| C800 | 10. 5750 | 28. 3560 | 3. 2570  |
| H801 | 9. 9910  | 29. 2650 | 3. 1590  |
| C802 | 10. 2260 | 27. 4110 | 4. 1900  |
| H803 | 9. 3760  | 27. 5550 | 4. 8470  |
| C804 | 11. 0410 | 25. 0590 | 5. 0750  |
| N805 | 12. 1080 | 26. 1000 | 3. 4760  |
| N806 | 12. 7760 | 24. 9420 | 3. 7230  |

|      |          |          |         |
|------|----------|----------|---------|
| N807 | 12. 1230 | 24. 3360 | 4. 6820 |
| C808 | 10. 1590 | 24. 5960 | 6. 1290 |
| C809 | 8. 9310  | 25. 0800 | 6. 5230 |
| H810 | 8. 4310  | 25. 9080 | 6. 0350 |
| C811 | 8. 3650  | 24. 3570 | 7. 6130 |
| H812 | 7. 4020  | 24. 5910 | 8. 0540 |
| C813 | 9. 1600  | 23. 3290 | 8. 0340 |
| S814 | 10. 6230 | 23. 2200 | 7. 1090 |
| H815 | 8. 9730  | 22. 6200 | 8. 8290 |
